# Supplementary material for: UNC-45A is required for neurite extension via controlling NMII activation
Source: PubMed Central journal article supplement — Mol Biol Cell. 2017 May 15;28(10):1337–46. doi: 10.1091/mbc.E16-06-0381 (PMC5426848; doi:10.1091/mbc.e16-06-0381), 2017-05-15
Supplement: supp_E16-06-0381v1_CombinedSupMats.pdf [file supp_E16-06-0381v1_CombinedSupMats.pdf]

# Supplemental Materials

*Molecular Biology of the Cell*

Iizuka et al.

## Supplementary Figure

### Supplementary Figure 1

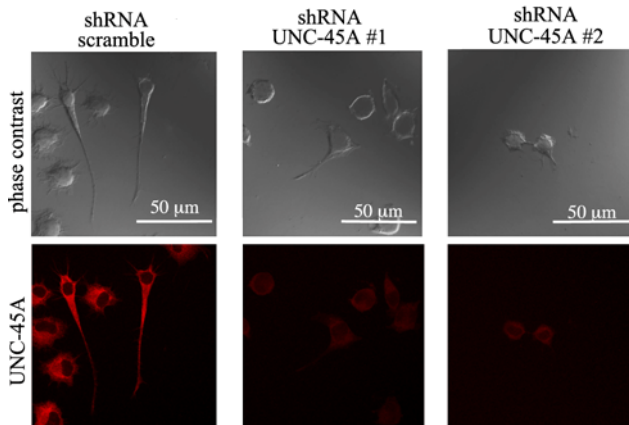

### Supplementary Figure 1.

**Specificity of UNC-45A immunostaining.** N2a transduced with either shRNA-scramble or shRNA targeting two different UNC-45A regions (#1 and #2), were differentiated and stained using an anti-UNC-45A antibody followed by Texas Red-conjugated anti-mouse IgG. Cells were analyzed by phase contrast (*top panels*) and fluorescence microscopy (*bottom panels*).
